# Supplementary material
Source: publisher figshare collection journal article supplement (https://acs.figshare.com/ndownloader/files/4170568)
Supplement: Supplementary file 1 [file 4170568]

## Supporting Information

# Optimization of (2,3-Dihydro-1-Benzofuran-3-yl)acetic Acids: Discovery of a Non-Free Fatty Acid-Like, Highly Bioavailable G Protein-Coupled Receptor 40/Free Fatty Acid Receptor 1 Agonist as a Glucose-Dependent Insulinotropic Agent

*Nobuyuki Negoro,<sup>†</sup> Shinobu Sasaki,<sup>†</sup> Satoshi Mikami,<sup>†</sup> Masahiro Ito,<sup>†</sup> Yoshiyuki Tsujihata,<sup>†</sup> Ryo Ito,<sup>†</sup>  
Masami Suzuki,<sup>†</sup> Koji Takeuchi,<sup>†</sup> Nobuhiro Suzuki,<sup>‡</sup> Junichi Miyazaki,<sup>‡</sup> Takashi Santou,<sup>†</sup> Tomoyuki  
Odani,<sup>†</sup> Naoyuki Kanzaki,<sup>†</sup> Miyuki Funami,<sup>‡</sup> Akio Morohashi,<sup>†</sup> Masami Nonaka,<sup>†</sup> Shinichiro  
Matsunaga,<sup>†</sup> Tsuneo Yasuma,<sup>\*,‡</sup> and Yu Momose<sup>†</sup>*

<sup>†</sup>Pharmaceutical Research Division, Takeda Pharmaceutical Company Limited, 26-1,  
Muraoka-Higashi 2-chome, Fujisawa, Kanagawa 251-8555, Japan;

<sup>‡</sup>Pharmaceutical Research Division, Takeda Pharmaceutical Company Limited, 17-85, Jusohonmachi  
2-chome, Yodogawa-ku, Osaka 532-8686, Japan

### Table of Contents:

Abbreviations of the solvents and reagents: Page S2

Experimental for compounds: Page S2–S13

X-Ray Crystallographic Data for Compound **16**: Page S14–S16

A. Crystal Data

B. Intensity Measurements

C. Structure Solution and Refinement

Abbreviations of the solvents and reagents are used as follows: CDCl<sub>3</sub>, deuteriochloroform; DMSO-*d*<sub>6</sub>, hexadeuterodimethyl sulfoxide; AcOEt, ethyl acetate; MeOH, methanol; EtOH, ethanol; IPA, 2-propanol; DMF, *N,N*-dimethylformamide; DMSO, dimethyl sulfoxide; THF, tetrahydrofuran; Et<sub>2</sub>O, diethyl ether; DME, 1,2-dimethoxyethane; CH<sub>3</sub>CN, acetonitrile; CH<sub>2</sub>Cl<sub>2</sub>, dichloromethane; NaBH<sub>4</sub>, sodium borohydride; LiAlH<sub>4</sub>, lithium aluminum hydride; AlCl<sub>3</sub>, aluminum chloride; NaOH, sodium hydroxide; HCl, hydrochloric acid; NH<sub>4</sub>Cl, ammonium chloride; NaHCO<sub>3</sub>, sodium hydrogen carbonate; MgSO<sub>4</sub>, magnesium sulfate; Na<sub>2</sub>SO<sub>4</sub>, sodium sulfate; Na<sub>2</sub>S<sub>2</sub>O<sub>3</sub>, sodium thiosulfate; K<sub>2</sub>CO<sub>3</sub>, potassium carbonate; Cs<sub>2</sub>CO<sub>3</sub>, cesium carbonate; K<sub>3</sub>PO<sub>4</sub>, potassium phosphate; TBAF, tetrabutylammonium fluoride; KI, potassium iodine; *m*-CPBA, *m*-chloroperbenzoic acid; Pd/C, palladium on carbon; Pd(PPh<sub>3</sub>)<sub>4</sub>, tetrakis(triphenylphosphine)palladium(0); *n*-BuLi, *n*-butyl lithium; B(*i*-PrO)<sub>3</sub>, triisopropyl borate; ADDP, 1,1'-(azodicarbonyl)dipiperidine; P(*n*-Bu)<sub>3</sub>, tributylphosphine; PPh<sub>3</sub>, triphenylphosphine; DEAD, diethyl azodicarboxylate; *p*-TsCl, *p*-toluenesulfonyl chloride; Et<sub>3</sub>N, triethylamine; TBSCl, *tert*-butyldimethylchlorosilane; *n*-Bu<sub>4</sub>NBr<sub>3</sub>, tetrabutylammonium tribromide; TiCl<sub>4</sub>, titanium (IV) chloride; Br<sub>2</sub>, bromine; AcOH, acetic acid; PdCl<sub>2</sub>(dppf)·CH<sub>2</sub>Cl<sub>2</sub>, [1,1'-bis(diphenylphosphino)ferrocene]dichloropalladium(II) complex with dichloromethane; NCS, *N*-chlorosuccinimide.

The following compounds **7–13** were also prepared from appropriate phenols **4a–c** and alcohols **5a–c** by a method similar to that described for **6**.

**[(3*R*)-6-{[4'-(2-Ethoxyethoxy)-2',6'-dimethylbiphenyl-3-yl]methoxy}-2,3-dihydro-1-benzofuran-3-yl]acetic Acid (**7**).**

Step 1: Methyl [(3*R*)-6-{[4'-(2-ethoxyethoxy)-2',6'-dimethylbiphenyl-3-yl]methoxy}-2,3-dihydro-1-benzofuran-3-yl]acetate in 89% yield as a colorless oil. <sup>1</sup>H NMR (CDCl<sub>3</sub>) δ 1.25 (t, *J* = 7.1 Hz, 3H), 1.98 (s, 6H), 2.50–2.61 (m, 1H), 2.69–2.79 (m, 1H), 3.62 (q, *J* = 7.1 Hz, 2H), 3.71 (s, 3H), 3.74–3.85 (m, 3H), 4.11–4.16 (m, 2H), 4.26 (dd, *J* = 9.1, 6.1 Hz, 1H), 4.75 (t, *J* = 9.1 Hz, 1H), 5.05 (s, 2H), 6.44–6.51 (m, 2H), 6.68 (s, 2H), 7.01 (d, *J* = 8.1 Hz, 1H), 7.08 (dt, *J* = 7.2, 1.6 Hz, 1H), 7.16 (s, 1H), 7.34–7.45 (m, 2H). MS *m/z* 491 (M + H)<sup>+</sup>. HPLC purity (220 nm) 100.0%.

Step 2: **7** in 80% yield as colorless crystals (hexane–AcOEt). mp 59–60 °C. [α]<sub>D</sub> –7.5° (c 0.31, CH<sub>3</sub>CN). 99.8% ee [column: CHIRALPAK AD, 4.6 mmID × 250 mmL; mobile phase: hexane/IPA/TFA (85/15/0.1) (v/v/v) by isocratic elution; flow rate: 0.5 mL/min; detection: UV 220 nm; temperature: room temperature]. <sup>1</sup>H NMR (CDCl<sub>3</sub>) δ 1.25 (t, *J* = 7.0 Hz, 3H), 1.98 (s, 6H), 2.55–2.67 (m, 1H), 2.76–2.85 (m, 1H), 3.62 (q, *J* = 7.0 Hz, 2H), 3.75–3.86 (m, 3H), 4.14 (t, *J* = 5.0 Hz, 2H), 4.28 (dd, *J* = 9.1, 6.1 Hz, 1H), 4.75 (t, *J* = 9.1 Hz, 1H), 5.05 (s, 2H), 6.44–6.52 (m, 2H), 6.68 (s, 2H), 7.02–7.11 (m, 2H), 7.16 (s, 1H), 7.34–7.45 (m, 2H). MS *m/z* 477 (M + H)<sup>+</sup>. HPLC purity (220 nm) 100.0%. Anal. Calcd for C<sub>29</sub>H<sub>32</sub>O<sub>6</sub>: C, 73.09; H, 6.77. Found: C, 73.02; H, 6.77.

**[6-({2',6'-Dimethyl-4'-[(3-methyloxetan-3-yl)methoxy]biphenyl-3-yl}methoxy)-2,3-dihydro-1-benzofuran-3-yl]acetic Acid (8).**

Step 1: Methyl [6-({2',6'-dimethyl-4'-[(3-methyloxetan-3-yl)methoxy]biphenyl-3-yl}methoxy)-2,3-dihydro-1-benzofuran-3-yl]acetate in 89% yield as a yellow oil. <sup>1</sup>H NMR (CDCl<sub>3</sub>) δ 1.45 (s, 3H), 2.00 (s, 6H), 2.49–2.61 (m, 1H), 2.69–2.80 (m, 1H), 3.71 (s, 3H), 3.74–3.86 (m, 1H), 4.04 (s, 2H), 4.26 (dd, *J* = 9.1, 6.1 Hz, 1H), 4.47 (d, *J* = 5.9 Hz, 2H), 4.64 (d, *J* = 5.9 Hz, 2H), 4.75 (t, *J* = 9.1 Hz, 1H), 5.06 (s, 2H), 6.44–6.51 (m, 2H), 6.70 (s, 2H), 7.02 (d, *J* = 8.1 Hz, 1H), 7.08 (dt, *J* = 7.1, 1.5 Hz, 1H), 7.17 (s, 1H), 7.35–7.46 (m, 2H). MS *m/z* 503 (M + H)<sup>+</sup>.

Step 2: **8** in 65% yield as colorless crystals (hexane–AcOEt). mp 150–151 °C. <sup>1</sup>H NMR (CDCl<sub>3</sub>) δ 1.45 (s, 3H), 2.00 (s, 6H), 2.55–2.67 (m, 1H), 2.75–2.86 (m, 1H), 3.75–3.87 (m, 1H), 4.04 (s, 2H), 4.28 (dd, *J* = 9.1, 6.0 Hz, 1H), 4.48 (d, *J* = 5.9 Hz, 2H), 4.65 (d, *J* = 5.9 Hz, 2H), 4.76 (t, *J* = 9.1 Hz, 1H), 5.06 (s, 2H), 6.44–6.52 (m, 2H), 6.70 (s, 2H), 7.01–7.11 (m, 2H), 7.17 (s, 1H), 7.34–7.46 (m, 2H). MS *m/z* 489 (M + H)<sup>+</sup>. HPLC purity (220 nm) 99.9%. Anal. Calcd for C<sub>30</sub>H<sub>32</sub>O<sub>6</sub>: C, 73.75; H, 6.60. Found: C, 73.53; H, 6.61.

**[(3S)-6-({2',6'-Dimethyl-4'-[(3-methyloxetan-3-yl)methoxy]biphenyl-3-yl}methoxy)-2,3-dihydro-1-benzofuran-3-yl]acetic Acid (9).**

Step 1: Methyl [(3S)-6-({2',6'-dimethyl-4'-[(3-methyloxetan-3-yl)methoxy]biphenyl-3-yl}methoxy)-2,3-dihydro-1-benzofuran-3-yl]acetate in 95% yield as a pale yellow oil. <sup>1</sup>H NMR (CDCl<sub>3</sub>) δ 1.45 (s, 3H), 2.00 (s, 6H), 2.50–2.60 (m, 1H), 2.70–2.79 (m, 1H), 3.72 (s, 3H), 3.74–3.86 (m, 1H), 4.04 (s, 2H), 4.26 (dd, *J* = 9.1, 6.0 Hz, 1H), 4.47 (d, *J* = 5.8 Hz, 2H), 4.64 (d, *J* = 5.8 Hz, 2H), 4.75 (t, *J* = 9.1 Hz, 1H), 5.06 (s, 2H), 6.44–6.51 (m, 2H), 6.70 (s, 2H), 7.02 (d, *J* = 8.1 Hz, 1H), 7.05–7.11 (m, 1H), 7.17 (s, 1H), 7.35–7.46 (m, 2H). MS *m/z* not detected.

Step 2: **9** in 66% yield as colorless crystals (hexane–AcOEt). mp 140–142 °C. [ $\alpha$ ]<sub>D</sub> +5.6° (c 0.30, CH<sub>3</sub>CN). 99.8% ee [column: CHIRALPAK OD, 4.6 mmID × 250 mmL; mobile phase: hexane/IPA/TFA (80/20/0.1) (v/v/v) by isocratic elution; flow rate: 0.5 mL/min; detection: UV 220 nm; temperature: 30 °C]. <sup>1</sup>H NMR (CDCl<sub>3</sub>) δ 1.45 (s, 3H), 2.00 (s, 6H), 2.56–2.67 (m, 1H), 2.76–2.85 (m, 1H), 3.75–3.86 (m, 1H), 4.04 (s, 2H), 4.29 (dd, *J* = 9.1, 6.0 Hz, 1H), 4.48 (d, *J* = 5.9 Hz, 2H), 4.65 (d, *J* = 5.9 Hz, 2H), 4.76 (t, *J* = 9.1 Hz, 1H), 5.06 (s, 2H), 6.44–6.52 (m, 2H), 6.70 (s, 2H), 7.02–7.11 (m, 2H), 7.17 (s, 1H), 7.35–7.46 (m, 2H). MS *m/z* 489 (M + H)<sup>+</sup>. HPLC purity (220 nm) 98.0%. Anal. Calcd for C<sub>30</sub>H<sub>32</sub>O<sub>6</sub>: C, 73.75; H, 6.60. Found: C, 73.50; H, 6.73.

**[(3R)-6-({2',6'-Dimethyl-4'-[(3-methyloxetan-3-yl)methoxy]biphenyl-3-yl}methoxy)-2,3-dihydro-1-benzofuran-3-yl]acetic Acid (10).**

Step 1: Methyl [(3R)-6-({2',6'-dimethyl-4'-[(3-methyloxetan-3-yl)methoxy]biphenyl-3-yl}methoxy)-2,3-dihydro-1-benzofuran-3-yl]acetate in 90% yield as a colorless oil. <sup>1</sup>H NMR (CDCl<sub>3</sub>) δ 1.45 (s, 3H), 2.00 (s, 6H), 2.50–2.61 (m, 1H), 2.70–2.80 (m, 1H), 3.72 (s, 3H), 3.74–3.86 (m, 1H),

4.04 (s, 2H), 4.26 (dd,  $J = 9.0, 6.1$  Hz, 1H), 4.47 (d,  $J = 5.8$  Hz, 2H), 4.64 (d,  $J = 5.8$  Hz, 2H), 4.75 (t,  $J = 9.0$  Hz, 1H), 5.06 (s, 2H), 6.44–6.51 (m, 2H), 6.70 (s, 2H), 7.02 (d,  $J = 7.9$  Hz, 1H), 7.08 (dt,  $J = 7.1, 1.6$  Hz, 1H), 7.17 (s, 1H), 7.35–7.46 (m, 2H). MS  $m/z$  not detected.

Step 2: **10** in 56% yield as colorless crystals (hexane–AcOEt). mp 136–138 °C.  $[\alpha]_D -5.6^\circ$  (c 0.31, CH<sub>3</sub>CN). 99.4% ee [column: CHIRALPAK OD, 4.6 mmID  $\times$  250 mmL; mobile phase: hexane/IPA/TFA (80/20/0.1) (v/v/v) by isocratic elution; flow rate: 0.5 mL/min; detection: UV 220 nm; temperature: 30 °C]. <sup>1</sup>H NMR (CDCl<sub>3</sub>)  $\delta$  1.45 (s, 3H), 2.00 (s, 6H), 2.55–2.67 (m, 1H), 2.75–2.86 (m, 1H), 3.75–3.87 (m, 1H), 4.04 (s, 2H), 4.29 (dd,  $J = 9.2, 6.0$  Hz, 1H), 4.48 (d,  $J = 5.8$  Hz, 2H), 4.65 (d,  $J = 6.0$  Hz, 2H), 4.76 (t,  $J = 9.0$  Hz, 1H), 5.06 (s, 2H), 6.44–6.52 (m, 2H), 6.71 (s, 2H), 7.02–7.11 (m, 2H), 7.17 (s, 1H), 7.35–7.46 (m, 2H). MS  $m/z$  489 (M + H)<sup>+</sup>. Anal. Calcd for C<sub>30</sub>H<sub>32</sub>O<sub>6</sub>: C, 73.75; H, 6.60. Found: C, 73.58; H, 6.77.

**[6-(4'-[(1,1-Dioxidotetrahydro-2H-thiopyran-4-yl)oxy]-2',6'-dimethylbiphenyl-3-yl)methoxy)-2,3-dihydro-1-benzofuran-3-yl]acetic Acid (11).**

Step 1: Methyl [6-(4'-[(1,1-dioxidotetrahydro-2H-thiopyran-4-yl)oxy]-2',6'-dimethylbiphenyl-3-yl)-methoxy)-2,3-dihydro-1-benzofuran-3-yl]acetate in 93% yield as a pale yellow oil. <sup>1</sup>H NMR (CDCl<sub>3</sub>)  $\delta$  1.99 (s, 6H), 2.31–2.60 (m, 5H), 2.70–2.79 (m, 1H), 2.89–3.00 (m, 2H), 3.39–3.52 (m, 2H), 3.72 (s, 3H), 3.75–3.86 (m, 1H), 4.26 (dd,  $J = 9.1, 6.1$  Hz, 1H), 4.64–4.70 (m, 1H), 4.75 (t,  $J = 9.1$  Hz, 1H), 5.06 (s, 2H), 6.44–6.50 (m, 2H), 6.67 (s, 2H), 7.02 (d,  $J = 7.9$  Hz, 1H), 7.07 (dt,  $J = 7.1, 1.5$  Hz, 1H), 7.16 (s, 1H), 7.35–7.46 (m, 2H). MS  $m/z$  551 (M + H)<sup>+</sup>. HPLC purity (220 nm) 99.6%.

Step 2: **11** in 80% yield as colorless crystals (hexane–AcOEt). mp 159–161 °C. <sup>1</sup>H NMR (CDCl<sub>3</sub>)  $\delta$  1.99 (s, 6H), 2.31–2.56 (m, 4H), 2.56–2.67 (m, 1H), 2.76–2.85 (m, 1H), 2.90–3.00 (m, 2H), 3.39–3.52 (m, 2H), 3.75–3.87 (m, 1H), 4.29 (dd,  $J = 9.1, 6.0$  Hz, 1H), 4.64–4.70 (m, 1H), 4.76 (t,  $J = 9.1$  Hz, 1H), 5.06 (s, 2H), 6.44–6.52 (m, 2H), 6.67 (s, 2H), 7.03–7.10 (m, 2H), 7.16 (s, 1H), 7.35–7.46 (m, 2H). MS  $m/z$  537 (M + H)<sup>+</sup>. HPLC purity (220 nm) 100.0%. Anal. Calcd for C<sub>30</sub>H<sub>32</sub>O<sub>7</sub>S: C, 67.14; H, 6.01. Found: C, 66.97; H, 6.12.

**[(3S)-6-(4'-[(1,1-Dioxidotetrahydro-2H-thiopyran-4-yl)oxy]-2',6'-dimethylbiphenyl-3-yl)methoxy)-2,3-dihydro-1-benzofuran-3-yl]acetic Acid (12).**

Step 1: Methyl [(3S)-6-(4'-[(1,1-dioxidotetrahydro-2H-thiopyran-4-yl)oxy]-2',6'-dimethylbiphenyl-3-yl)methoxy)-2,3-dihydro-1-benzofuran-3-yl]acetate in 79% yield as a colorless oil. <sup>1</sup>H NMR (CDCl<sub>3</sub>)  $\delta$  1.99 (s, 6H), 2.31–2.60 (m, 5H), 2.70–2.79 (m, 1H), 2.89–3.00 (m, 2H), 3.39–3.52 (m, 2H), 3.72 (s, 3H), 3.75–3.86 (m, 1H), 4.26 (dd,  $J = 9.1, 6.0$  Hz, 1H), 4.64–4.69 (m, 1H), 4.75 (t,  $J = 9.1$  Hz, 1H), 5.06 (s, 2H), 6.44–6.50 (m, 2H), 6.67 (s, 2H), 7.02 (d,  $J = 7.9$  Hz, 1H), 7.04–7.09 (m, 1H), 7.16 (s, 1H), 7.35–7.46 (m, 2H). MS  $m/z$  551 (M + H)<sup>+</sup>.

Step 2: **12** in 85% yield as colorless crystals (heptane–AcOEt). mp 154–155 °C.  $[\alpha]_D +6.1^\circ$  (c 0.30, CH<sub>3</sub>CN). <sup>1</sup>H NMR (CDCl<sub>3</sub>)  $\delta$  1.99 (s, 6H), 2.30–2.44 (m, 2H), 2.45–2.56 (m, 2H), 2.56–2.67 (m, 1H), 2.75–2.86 (m, 1H), 2.89–3.00 (m, 2H), 3.38–3.52 (m, 2H), 3.75–3.87 (m, 1H), 4.29 (dd,  $J = 9.1$ , 6.1 Hz, 1H), 4.63–4.70 (m, 1H), 4.76 (t,  $J = 9.1$  Hz, 1H), 5.06 (s, 2H), 6.44–6.52 (m, 2H), 6.67 (s, 2H), 7.02–7.10 (m, 2H), 7.16 (s, 1H), 7.35–7.46 (m, 2H). MS  $m/z$  537 (M + H)<sup>+</sup>. HPLC purity (220 nm) 99.8%. Anal. Calcd for C<sub>30</sub>H<sub>32</sub>O<sub>7</sub>S: C, 67.14; H, 6.01. Found: C, 67.10; H, 6.06.

**[(3R)-6-({4'-[(1,1-Dioxidotetrahydro-2H-thiopyran-4-yl)oxy]-2',6'-dimethylbiphenyl-3-yl}methoxy)-2,3-dihydro-1-benzofuran-3-yl]acetic Acid (**13**).**

Step 1: Methyl [(3R)-6-({4'-[(1,1-dioxidotetrahydro-2H-thiopyran-4-yl)oxy]-2',6'-dimethylbiphenyl-3-yl}methoxy)-2,3-dihydro-1-benzofuran-3-yl]acetate in 86% yield as a colorless foam. <sup>1</sup>H NMR (CDCl<sub>3</sub>)  $\delta$  1.99 (s, 6H), 2.30–2.61 (m, 5H), 2.70–2.79 (m, 1H), 2.89–2.99 (m, 2H), 3.38–3.52 (m, 2H), 3.72 (s, 3H), 3.74–3.86 (m, 1H), 4.26 (dd,  $J = 9.1$ , 6.0 Hz, 1H), 4.63–4.69 (m, 1H), 4.75 (t,  $J = 9.1$  Hz, 1H), 5.06 (s, 2H), 6.42–6.50 (m, 2H), 6.67 (s, 2H), 6.99–7.10 (m, 2H), 7.16 (s, 1H), 7.35–7.46 (m, 2H).

Step 2: **13** in 92% yield as colorless crystals (heptane–AcOEt). mp 156–157 °C.  $[\alpha]_D -4.4^\circ$  (c 0.30, CH<sub>3</sub>CN). <sup>1</sup>H NMR (CDCl<sub>3</sub>)  $\delta$  1.99 (s, 6H), 2.30–2.44 (m, 2H), 2.45–2.67 (m, 3H), 2.74–2.86 (m, 1H), 2.89–3.00 (m, 2H), 3.38–3.52 (m, 2H), 3.75–3.87 (m, 1H), 4.29 (dd,  $J = 9.1$ , 6.0 Hz, 1H), 4.63–4.69 (m, 1H), 4.76 (t,  $J = 9.1$  Hz, 1H), 5.06 (s, 2H), 6.44–6.52 (m, 2H), 6.67 (s, 2H), 7.02–7.10 (m, 2H), 7.16 (s, 1H), 7.35–7.46 (m, 2H). MS  $m/z$  537 (M + H)<sup>+</sup>. HPLC purity (220 nm) 99.8%. Anal. Calcd for C<sub>30</sub>H<sub>32</sub>O<sub>7</sub>S: C, 67.14; H, 6.01. Found: C, 66.94; H, 6.02.

The following compound **17b** was prepared from **4b** and **5h** by a method similar to that described for **17a**.

**Methyl {(3S)-6-[(3'-Chloro-4'-hydroxy-2',6'-dimethylbiphenyl-3-yl)methoxy]-2,3-dihydro-1-benzofuran-3-yl}acetate (**17b**).**

Step 1: Methyl {(3S)-6-[(4'-{[*tert*-butyl(dimethyl)silyl]oxy}-3'-chloro-2',6'-dimethylbiphenyl-3-yl)methoxy]-2,3-dihydro-1-benzofuran-3-yl}acetate in 77% yield as colorless crystals. <sup>1</sup>H NMR (CDCl<sub>3</sub>)  $\delta$  0.26 (s, 6H), 1.06 (s, 9H), 1.92 (s, 3H), 2.04 (s, 3H), 2.50–2.61 (m, 1H), 2.70–2.79 (m, 1H), 3.71 (s, 3H), 3.75–3.86 (m, 1H), 4.26 (dd,  $J = 9.1$ , 6.0 Hz, 1H), 4.75 (t,  $J = 9.1$  Hz, 1H), 5.05 (s, 2H), 6.44–6.51 (m, 2H), 6.65 (s, 1H), 6.99–7.07 (m, 2H), 7.14 (s, 1H), 7.36–7.46 (m, 2H). MS  $m/z$  567 (M + H)<sup>+</sup>.

Step 2: **17b** in 88% yield as a colorless oil. <sup>1</sup>H NMR (CDCl<sub>3</sub>)  $\delta$  1.94 (s, 3H), 2.04 (s, 3H), 2.49–2.61 (m, 1H), 2.69–2.80 (m, 1H), 3.71 (s, 3H), 3.74–3.86 (m, 1H), 4.26 (dd,  $J = 9.1$ , 6.0 Hz, 1H), 4.75 (t,  $J = 9.1$  Hz, 1H), 5.06 (s, 2H), 5.55 (s, 1H), 6.43–6.51 (m, 2H), 6.81 (s, 1H), 6.99–7.07 (m, 2H), 7.13 (s, 1H), 7.36–7.47 (m, 2H). MS  $m/z$  453 (M + H)<sup>+</sup>.

The following compounds **20** and **21** were also prepared from **17a** and appropriate alcohols by a method similar to that described for **18**.

**[(3*S*)-6-({4'-[(2,4-Dimethyl-1,3-thiazol-5-yl)methoxy]-2',6'-dimethylbiphenyl-3-yl}methoxy)-2,3-dihydro-1-benzofuran-3-yl]acetic Acid (**20**).**

Step 1: Methyl [(3*S*)-6-({4'-[(2,4-dimethyl-1,3-thiazol-5-yl)methoxy]-2',6'-dimethylbiphenyl-3-yl}methoxy)-2,3-dihydro-1-benzofuran-3-yl]acetate as a crude product (a colorless oil). MS *m/z* 544 (*M* + *H*)<sup>+</sup>.

Step 2: **20** in 24% yield (from **17a**) as colorless crystals (hexane–AcOEt). mp 158–159 °C. <sup>1</sup>H NMR (CDCl<sub>3</sub>) δ 1.91 (s, 6H), 2.34 (s, 3H), 2.59 (s, 3H), 2.61–2.80 (m, 2H), 3.56–3.74 (m, 1H), 4.18 (dd, *J* = 9.0, 6.8 Hz, 1H), 4.68 (t, *J* = 9.0 Hz, 1H), 5.09 (s, 2H), 5.20 (s, 2H), 6.42–6.56 (m, 2H), 6.77 (s, 2H), 7.02–7.16 (m, 3H), 7.35–7.49 (m, 2H). MS *m/z* 530 (*M* + *H*)<sup>+</sup>. HPLC purity (220 nm) 99.1%.

**[(3*S*)-6-{{4'-(Imidazo[1,2-*a*]pyridin-5-yl)methoxy}-2',6'-dimethylbiphenyl-3-yl}methoxy}-2,3-dihydro-1-benzofuran-3-yl]acetic Acid (**21**).**

Step 1: Methyl [(3*S*)-6-{{4'-(imidazo[1,2-*a*]pyridin-5-yl)methoxy}-2',6'-dimethylbiphenyl-3-yl}methoxy}-2,3-dihydro-1-benzofuran-3-yl]acetate as a crude product (a colorless oil). MS *m/z* 549 (*M* + *H*)<sup>+</sup>.

Step 2: **21** in 16% yield (from **17a**) as colorless crystals (hexane–AcOEt). mp 204–205 °C. <sup>1</sup>H NMR (DMSO-*d*<sub>6</sub>) δ 1.93 (s, 6H), 2.38 (dd, *J* = 16.5, 9.0 Hz, 1H), 2.62 (dd, *J* = 16.5, 5.5 Hz, 1H), 3.56–3.71 (m, 1H), 4.16 (dd, *J* = 9.0, 6.9 Hz, 1H), 4.66 (t, *J* = 9.0 Hz, 1H), 5.09 (s, 2H), 5.46 (s, 2H), 6.41–6.49 (m, 2H), 6.90 (s, 2H), 7.03–7.12 (m, 2H), 7.12–7.17 (m, 2H), 7.31 (dd, *J* = 9.0, 6.8 Hz, 1H), 7.35–7.48 (m, 2H), 7.60–7.71 (m, 2H), 7.93 (s, 1H). MS *m/z* 535 (*M* + *H*)<sup>+</sup>. HPLC purity (220 nm) 99.3%.

The following compounds **22–26** were also prepared from **4b** and appropriate alcohols **5i–m** by a method similar to that described for **6**.

**[(3*S*)-6-({2',6'-Diethyl-4'-[3-(methylsulfonyl)propoxy]biphenyl-3-yl}methoxy)-2,3-dihydro-1-benzofuran-3-yl]acetic Acid (**22**).**

Step 1: Methyl [(3*S*)-6-({2',6'-diethyl-4'-[3-(methylsulfonyl)propoxy]biphenyl-3-yl}methoxy)-2,3-dihydro-1-benzofuran-3-yl]acetate in 93% yield as a yellow oil. <sup>1</sup>H NMR (CDCl<sub>3</sub>) δ 0.98 (t, *J* = 7.5 Hz, 6H), 2.22–2.43 (m, 6H), 2.49–2.60 (m, 1H), 2.70–2.78 (m, 1H), 2.97 (s, 3H), 3.25–3.33 (m, 2H), 3.71 (s, 3H), 3.74–3.85 (m, 1H), 4.12–4.18 (m, 2H), 4.25 (dd, *J* = 9.0, 6.1 Hz, 1H), 4.74 (t, *J* = 9.0 Hz, 1H), 5.06 (s, 2H), 6.43–6.49 (m, 2H), 6.66 (s, 2H), 7.00 (d, *J* = 8.1 Hz, 1H), 7.07–7.11 (m, 1H), 7.18 (s, 1H), 7.36–7.44 (m, 2H). MS *m/z* 567 (*M* + *H*)<sup>+</sup>.

Step 2: **22** in 81% yield as colorless crystals (heptane–AcOEt). mp 87–89 °C.  $[\alpha]_D +5.5^\circ$  (c 0.30, CH<sub>3</sub>CN). <sup>1</sup>H NMR (CDCl<sub>3</sub>)  $\delta$  0.98 (t,  $J$  = 7.5 Hz, 6H), 2.22–2.42 (m, 6H), 2.55–2.66 (m, 1H), 2.75–2.85 (m, 1H), 2.97 (s, 3H), 3.25–3.33 (m, 2H), 3.74–3.86 (m, 1H), 4.15 (t,  $J$  = 5.7 Hz, 2H), 4.28 (dd,  $J$  = 9.1, 6.1 Hz, 1H), 4.75 (t,  $J$  = 9.1 Hz, 1H), 5.07 (s, 2H), 6.43–6.51 (m, 2H), 6.66 (s, 2H), 7.04 (d,  $J$  = 8.3 Hz, 1H), 7.06–7.12 (m, 1H), 7.18 (s, 1H), 7.35–7.45 (m, 2H). MS  $m/z$  553 (M + H)<sup>+</sup>. HPLC purity (220 nm) 99.9%. Anal. Calcd for C<sub>29</sub>H<sub>32</sub>O<sub>8</sub>S·0.15 heptane: C, 67.81; H, 6.82. Found: C, 67.88; H, 6.84.

**[(3S)-6-({4'-[(1,1-Dioxidotetrahydro-2H-thiopyran-4-yl)oxy]-2',3',5',6'-tetramethylbiphenyl-3-yl}methoxy)-2,3-dihydro-1-benzofuran-3-yl]acetic Acid (23).**

Step 1: Methyl [(3S)-6-({4'-[(1,1-dioxidotetrahydro-2H-thiopyran-4-yl)oxy]-2',3',5',6'-tetramethylbiphenyl-3-yl}methoxy)-2,3-dihydro-1-benzofuran-3-yl]acetate in 81% yield as a colorless amorphous powder. <sup>1</sup>H NMR (CDCl<sub>3</sub>)  $\delta$  1.87 (s, 6H), 2.20 (s, 6H), 2.30–2.60 (m, 5H), 2.70–2.79 (m, 1H), 2.95–3.08 (m, 2H), 3.31–3.43 (m, 2H), 3.72 (s, 3H), 3.75–3.86 (m, 1H), 3.94–4.03 (m, 1H), 4.26 (dd,  $J$  = 9.1, 6.0 Hz, 1H), 4.75 (t,  $J$  = 9.1 Hz, 1H), 5.05 (s, 2H), 6.44–6.51 (m, 2H), 6.99–7.06 (m, 2H), 7.12 (s, 1H), 7.35–7.45 (m, 2H). MS  $m/z$  579 (M + H)<sup>+</sup>.

Step 2: **23** in 64% yield as colorless crystals (heptane–AcOEt). mp 143–145 °C.  $[\alpha]_D +2.8^\circ$  (c 0.30, CHCl<sub>3</sub>). <sup>1</sup>H NMR (CDCl<sub>3</sub>)  $\delta$  1.87 (s, 6H), 2.20 (s, 6H), 2.29–2.55 (m, 4H), 2.55–2.67 (m, 1H), 2.75–2.85 (m, 1H), 2.95–3.08 (m, 2H), 3.31–3.44 (m, 2H), 3.74–3.87 (m, 1H), 3.94–4.04 (m, 1H), 4.28 (dd,  $J$  = 9.1, 6.1 Hz, 1H), 4.76 (t,  $J$  = 9.1 Hz, 1H), 5.05 (s, 2H), 7.00–7.08 (m, 2H), 7.12 (s, 1H), 7.35–7.46 (m, 2H). MS  $m/z$  565 (M + H)<sup>+</sup>. HPLC purity (220 nm) 99.6%. Anal. Calcd for C<sub>32</sub>H<sub>36</sub>O<sub>7</sub>S: C, 68.06; H, 6.43. Found: C, 67.80; H, 6.40.

**[(3S)-6-({2',3',5',6'-Tetramethyl-4'-[3-(methylsulfonyl)propoxy]biphenyl-3-yl}methoxy)-2,3-dihydro-1-benzofuran-3-yl]acetic Acid (24).**

Step 1: Methyl [(3S)-6-({2',3',5',6'-tetramethyl-4'-[3-(methylsulfonyl)propoxy]biphenyl-3-yl}methoxy)-2,3-dihydro-1-benzofuran-3-yl]acetate in 82% yield as a colorless oil. <sup>1</sup>H NMR (CDCl<sub>3</sub>)  $\delta$  1.87 (s, 6H), 2.19 (s, 6H), 2.32–2.43 (m, 2H), 2.50–2.61 (m, 1H), 2.70–2.79 (m, 1H), 3.00 (s, 3H), 3.35–3.43 (m, 2H), 3.71 (s, 3H), 3.74–3.90 (m, 3H), 4.26 (dd,  $J$  = 9.1, 6.0 Hz, 1H), 4.75 (t,  $J$  = 9.1 Hz, 1H), 5.05 (s, 2H), 6.43–6.51 (m, 2H), 6.99–7.07 (m, 2H), 7.13 (s, 1H), 7.35–7.45 (m, 2H). MS  $m/z$  567 (M + H)<sup>+</sup>.

Step 2: **24** in 94% yield as colorless crystals (heptane–AcOEt). mp 160–162 °C.  $[\alpha]_D +6.3^\circ$  (c 0.30, CH<sub>3</sub>CN). <sup>1</sup>H NMR (CDCl<sub>3</sub>)  $\delta$  1.87 (s, 6H), 2.19 (s, 6H), 2.32–2.43 (m, 2H), 2.56–2.66 (m, 1H), 2.75–2.85 (m, 1H), 3.00 (s, 3H), 3.35–3.43 (m, 2H), 3.75–3.89 (m, 3H), 4.28 (dd,  $J$  = 9.1, 6.0 Hz, 1H), 4.76 (t,  $J$  = 9.1 Hz, 1H), 5.05 (s, 2H), 6.44–6.52 (m, 2H), 7.01–7.07 (m, 2H), 7.13 (s, 1H), 7.35–7.45 (m, 2H). MS  $m/z$  553 (M + H)<sup>+</sup>. HPLC purity (220 nm) 99.3%. Anal. Calcd for C<sub>31</sub>H<sub>36</sub>O<sub>7</sub>S: C, 67.37; H, 6.57. Found: C, 67.39; H, 6.64.

**[(3*S*)-6-({4'-[(1,1-Dioxidotetrahydro-2*H*-thiopyran-4-yl)oxy]-3'-fluoro-2',6'-dimethylbiphenyl-3-yl}methoxy)-2,3-dihydro-1-benzofuran-3-yl]acetic Acid (25).**

Step 1: Methyl [(3*S*)-6-({4'-[(1,1-dioxidotetrahydro-2*H*-thiopyran-4-yl)oxy]-3'-fluoro-2',6'-dimethylbiphenyl-3-yl}methoxy)-2,3-dihydro-1-benzofuran-3-yl]acetate as a crude product (a colorless oil). MS *m/z* 569 (M + H)<sup>+</sup>.

Step 2: **25** in 15% yield (from **43c**) as colorless crystals (hexane–diisopropyl ether). mp 112–113 °C. <sup>1</sup>H NMR (CDCl<sub>3</sub>) δ 1.89–1.97 (m, 6H), 2.29–2.45 (m, 2H), 2.46–2.56 (m, 2H), 2.61 (dd, *J* = 16.8, 9.0 Hz, 1H), 2.81 (dd, *J* = 16.8, 5.7 Hz, 1H), 2.90–3.01 (m, 2H), 3.46–3.59 (m, 2H), 3.75–3.86 (m, 1H), 4.29 (dd, *J* = 9.2, 6.0 Hz, 1H), 4.56–4.64 (m, 1H), 4.76 (t, *J* = 9.2 Hz, 1H), 5.06 (s, 2H), 6.44–6.51 (m, 2H), 6.74 (d, *J* = 8.3 Hz, 1H), 7.02–7.08 (m, 2H), 7.14 (s, 1H), 7.37–7.48 (m, 2H). MS *m/z* 535 (M + H)<sup>+</sup>. HPLC purity (220 nm) 99.4%.

**[6-({3'-Fluoro-2',6'-dimethyl-4'-[3-(methylsulfonyl)propoxy]biphenyl-3-yl}methoxy)-2,3-dihydro-1-benzofuran-3-yl]acetic Acid (26).**

Step 1: Methyl [(3*S*)-6-({3'-fluoro-2',6'-dimethyl-4'-[3-(methylsulfonyl)propoxy]biphenyl-3-yl}methoxy)-2,3-dihydro-1-benzofuran-3-yl]acetate in 77% yield as colorless crystals (heptane–AcOEt). mp 101–103 °C. <sup>1</sup>H NMR (CDCl<sub>3</sub>) δ 1.90–1.93 (m, 3H), 1.96 (s, 3H), 2.33–2.44 (m, 2H), 2.55 (dd, *J* = 16.5, 5.7 Hz, 1H), 2.75 (dd, *J* = 16.5, 9.0 Hz, 1H), 2.98 (s, 3H), 3.28–3.35 (m, 2H), 3.72 (s, 3H), 3.74–3.86 (m, 1H), 4.17–4.29 (m, 3H), 4.75 (t, *J* = 9.0 Hz, 1H), 5.06 (s, 2H), 6.44–6.51 (m, 2H), 6.70 (d, *J* = 8.3 Hz, 1H), 6.99–7.07 (m, 2H), 7.13 (s, 1H), 7.36–7.46 (m, 2H). MS *m/z* 557 (M + H)<sup>+</sup>. Anal. Calcd for C<sub>30</sub>H<sub>33</sub>FO<sub>7</sub>S: C, 64.73; H, 5.98. Found: C, 64.75; H, 5.90.

Step 2: **26** in 90% yield as colorless crystals (heptane–AcOEt). mp 115–117 °C. [α]<sub>D</sub> +5.9° (c 0.30, CH<sub>3</sub>CN). <sup>1</sup>H NMR (CDCl<sub>3</sub>) δ 1.89–1.98 (m, 6H), 2.32–2.44 (m, 2H), 2.60 (dd, *J* = 16.8, 9.0 Hz, 1H), 2.80 (dd, *J* = 16.8, 5.4 Hz, 1H), 2.98 (s, 3H), 3.27–3.35 (m, 2H), 3.73–3.86 (m, 1H), 4.20 (t, *J* = 5.7 Hz, 2H), 4.28 (dd, *J* = 9.2, 6.0 Hz, 1H), 4.75 (t, *J* = 9.2 Hz, 1H), 5.06 (s, 2H), 6.44–6.51 (m, 2H), 6.70 (d, *J* = 8.1 Hz, 1H), 7.02–7.08 (m, 2H), 7.13 (s, 1H), 7.37–7.46 (m, 2H). MS *m/z* 543 (M + H)<sup>+</sup>. HPLC purity (220 nm) 99.9%. Anal. C<sub>29</sub>H<sub>31</sub>FO<sub>7</sub>S: C, 64.19; H, 5.76. Found: C, 64.40; H, 5.92.

The following compound **28** was prepared from **4b** and **5n** by a similar to that described for **6**.

**[(3*S*)-6-({3',5'-Dichloro-2',6'-dimethyl-4'-[3-(methylsulfonyl)propoxy]biphenyl-3-yl}methoxy)-2,3-dihydro-1-benzofuran-3-yl]acetic Acid (28).**

Step 1: Methyl [(3*S*)-6-({3',5'-dichloro-2',6'-dimethyl-4'-[3-(methylsulfonyl)propoxy]biphenyl-3-yl}methoxy)-2,3-dihydro-1-benzofuran-3-yl]acetate in 89% yield as a yellow oil. <sup>1</sup>H NMR



(CDCl<sub>3</sub>)  $\delta$  2.02 (s, 6H), 2.35–2.47 (m, 2H), 2.50–2.61 (m, 1H), 2.70–2.79 (m, 1H), 3.00 (s, 3H), 3.43–3.52 (m, 2H), 3.72 (s, 3H), 3.75–3.86 (m, 1H), 4.16 (t,  $J$  = 5.7 Hz, 2H), 4.26 (dd,  $J$  = 9.1, 6.0 Hz, 1H), 4.75 (t,  $J$  = 9.1 Hz, 1H), 5.06 (s, 2H), 6.43–6.50 (m, 2H), 6.99–7.05 (m, 2H), 7.11 (s, 1H), 7.39–7.49 (m, 2H). MS  $m/z$  607 ( $M + H$ )<sup>+</sup>.

Step 2: **28** in 86% yield as colorless crystals (heptane–AcOEt). mp 115–116 °C.  $[\alpha]_D +4.7^\circ$  (c 0.30, CH<sub>3</sub>CN). <sup>1</sup>H NMR (CDCl<sub>3</sub>)  $\delta$  2.02 (s, 6H), 2.36–2.47 (m, 2H), 2.56–2.67 (m, 1H), 2.76–2.85 (m, 1H), 3.00 (s, 3H), 3.43–3.52 (m, 2H), 3.75–3.87 (m, 1H), 4.16 (t,  $J$  = 5.7 Hz, 2H), 4.29 (dd,  $J$  = 9.1, 6.0 Hz, 1H), 4.76 (t,  $J$  = 9.1 Hz, 1H), 5.06 (s, 2H), 6.44–6.51 (m, 2H), 7.00–7.08 (m, 2H), 7.11 (s, 1H), 7.39–7.49 (m, 2H). MS  $m/z$  593 ( $M + H$ )<sup>+</sup>. HPLC purity (220 nm) 99.8%. Anal. Calcd for C<sub>29</sub>H<sub>30</sub>Cl<sub>2</sub>O<sub>7</sub>S: C, 58.69; H, 5.09. Found: C, 58.69; H, 4.99.

**{4'-[2-(Ethylthio)ethoxy]-2',6'-dimethylbiphenyl-3-yl}methanol (5e).**

The title compound was prepared from **32** and 2-chloroethyl ethyl sulfide by a method similar to that described for **5a** in 47% yield as a colorless oil. <sup>1</sup>H NMR (CDCl<sub>3</sub>)  $\delta$  1.31 (t,  $J$  = 7.3 Hz, 3H), 1.67 (t,  $J$  = 5.8 Hz, 1H), 2.00 (s, 6H), 2.67 (q,  $J$  = 7.3 Hz, 2H), 2.92 (t,  $J$  = 7.0 Hz, 2H), 4.16 (t,  $J$  = 7.0 Hz, 2H), 4.73 (d,  $J$  = 5.8 Hz, 2H), 6.66 (s, 2H), 7.06 (dt,  $J$  = 7.3, 1.3 Hz, 1H), 7.12 (s, 1H), 7.30–7.36 (m, 1H), 7.41 (t,  $J$  = 7.3 Hz, 1H). MS  $m/z$  299 ( $M - 18 + H$ )<sup>+</sup>.

Compounds **33a–c** were prepared from **31** and appropriate alkylating agents (**30a**, 1-oxa-6-thiaspiro[2.5]octane, or **30b**) by a method similar to that described for **5a**.

**2',6'-Dimethyl-4'-[(3-methyloxetan-3-yl)methoxy]biphenyl-3-carbaldehyde (33a).**

98% yield as a colorless oil. <sup>1</sup>H NMR (CDCl<sub>3</sub>)  $\delta$  1.46 (s, 3H), 2.01 (s, 6H), 4.06 (s, 2H), 4.48 (d,  $J$  = 5.8 Hz, 2H), 4.65 (d,  $J$  = 5.8 Hz, 2H), 6.73 (s, 2H), 7.42 (dt,  $J$  = 7.6, 1.4 Hz, 1H), 7.59 (t,  $J$  = 7.6 Hz, 1H), 7.67 (t,  $J$  = 1.4 Hz, 1H), 7.87 (dt,  $J$  = 7.6, 1.4 Hz, 1H), 10.05 (s, 1H). MS  $m/z$  333 ( $M + Na$ )<sup>+</sup>.

**4'-[(4-Hydroxytetrahydro-2H-thiopyran-4-yl)methoxy]-2',6'-dimethylbiphenyl-3-carbaldehyde (33b).**

89% yield as colorless crystals. <sup>1</sup>H NMR (CDCl<sub>3</sub>)  $\delta$  1.70 (t,  $J$  = 5.8 Hz, 1H), 1.76–1.90 (m, 2H), 2.01 (s, 6H), 2.05–2.16 (m, 2H), 2.20 (s, 1H), 2.40–2.53 (m, 2H), 3.03–3.18 (m, 2H), 3.80 (s, 2H), 4.73 (d,  $J$  = 5.8 Hz, 2H), 6.67 (s, 2H), 7.02–7.09 (m, 1H), 7.12 (s, 1H), 7.31–7.37 (m, 1H), 7.41 (t,  $J$  = 7.4 Hz, 1H).

**2',6'-Dimethyl-4'-[3-(methylsulfonyl)propoxy]biphenyl-3-carbaldehyde (33c).**

77% yield as colorless crystals. mp 91–94 °C. <sup>1</sup>H NMR (CDCl<sub>3</sub>)  $\delta$  1.99 (s, 6H), 2.30–2.42 (m, 2H), 2.97 (s, 3H), 3.24–3.32 (m, 2H), 4.14 (t,  $J$  = 5.7 Hz, 2H), 6.67 (s, 2H), 7.41 (dt,  $J$  = 7.6, 1.5 Hz,

1H), 7.59 (t,  $J$  = 7.6 Hz, 1H), 7.66 (t,  $J$  = 1.5 Hz, 1H), 7.87 (dt,  $J$  = 7.6, 1.5 Hz, 1H), 10.05 (s, 1H). MS  $m/z$  347 ( $M + H$ )<sup>+</sup>. Anal. Calcd for C<sub>19</sub>H<sub>22</sub>O<sub>4</sub>S: C, 65.87; H, 6.40. Found: C, 65.82; H, 6.47.

Compounds **5b**, **d**, **f**, and **g** were prepared from **33a–d** by a method similar to that described for **32**.

**{2',6'-Dimethyl-4'-[(3-methyloxetan-3-yl)methoxy]biphenyl-3-yl}methanol (5b).**

92% yield as colorless crystals. mp 82 °C. <sup>1</sup>H NMR (CDCl<sub>3</sub>) δ 1.45 (s, 3H), 1.68 (t,  $J$  = 5.9 Hz, 1H), 2.01 (s, 6H), 4.05 (s, 2H), 4.47 (d,  $J$  = 5.9 Hz, 2H), 4.65 (d,  $J$  = 5.9 Hz, 2H), 4.74 (d,  $J$  = 5.9 Hz, 2H), 6.71 (s, 2H), 7.07 (d,  $J$  = 7.5 Hz, 1H), 7.13 (s, 1H), 7.32–7.37 (m, 1H), 7.41 (t,  $J$  = 7.5 Hz, 1H). MS  $m/z$  313 ( $M + H$ )<sup>+</sup>. HPLC purity (220 nm) 98.0%. Anal. Calcd for C<sub>20</sub>H<sub>24</sub>O<sub>3</sub>: C, 76.89; H, 7.74. Found: C, 76.71; H, 7.87.

**4-({3'-(Hydroxymethyl)-2,6-dimethylbiphenyl-4-yl}oxy)methyl)tetrahydro-2H-thiopyran-4-ol (5d).**

94% yield as colorless crystals. <sup>1</sup>H NMR (CDCl<sub>3</sub>) δ 1.70 (t,  $J$  = 5.8 Hz, 1H), 1.76–1.90 (m, 2H), 2.01 (s, 6H), 2.05–2.16 (m, 2H), 2.20 (s, 1H), 2.40–2.53 (m, 2H), 3.03–3.18 (m, 2H), 3.80 (s, 2H), 4.73 (d,  $J$  = 5.8 Hz, 2H), 6.67 (s, 2H), 7.02–7.09 (m, 1H), 7.12 (s, 1H), 7.31–7.37 (m, 1H), 7.41 (t,  $J$  = 7.4 Hz, 1H).

**{2',6'-Dimethyl-4'-[3-(methylsulfonyl)propoxy]biphenyl-3-yl}methanol (5f).**

97% yield as colorless crystals. mp 96–98 °C. <sup>1</sup>H NMR (CDCl<sub>3</sub>) δ 1.68 (t,  $J$  = 5.9 Hz, 1H), 2.00 (s, 6H), 2.30–2.40 (m, 2H), 2.97 (s, 3H), 3.24–3.31 (m, 2H), 4.13 (t,  $J$  = 5.7 Hz, 2H), 4.73 (d,  $J$  = 5.9 Hz, 2H), 6.64 (s, 2H), 7.03–7.08 (m, 1H), 7.12 (s, 1H), 7.31–7.37 (m, 1H), 7.41 (t,  $J$  = 7.5 Hz, 1H). MS  $m/z$  331 ( $M - 18 + H$ )<sup>+</sup>. Anal. Calcd for C<sub>19</sub>H<sub>24</sub>O<sub>4</sub>S: C, 65.49; H, 6.94. Found: C, 65.25; H, 7.19.

**(4'-{tert-Butyl(dimethyl)silyl}oxy)-2',6'-dimethylbiphenyl-3-yl)methanol (5g).**

94% yield as colorless crystals. <sup>1</sup>H NMR (CDCl<sub>3</sub>) δ 0.23 (s, 6H), 1.00 (s, 9H), 1.96 (s, 6H), 4.73 (s, 2H), 6.58 (s, 2H), 7.07 (d,  $J$  = 7.5 Hz, 1H), 7.13 (s, 1H), 7.32 (t,  $J$  = 7.5 Hz, 1H), 7.40 (t,  $J$  = 7.5 Hz, 1H).

Compound **42a–c** was prepared from **38a–c** and 3-formylphenylboronic acid by a method similar to that described for **5b**-step 1.

**2',6'-Diethyl-4'-hydroxybiphenyl-3-carbaldehyde (42a).**

68% yield as a yellow oil.  $^1\text{H}$  NMR ( $\text{CDCl}_3$ )  $\delta$  1.00 (t,  $J = 7.5$  Hz, 6H), 2.25 (q,  $J = 7.5$  Hz, 4H), 4.92 (s, 1H), 6.65 (s, 2H), 7.44 (dt,  $J = 7.6, 1.5$  Hz, 1H), 7.58 (t,  $J = 7.6$  Hz, 1H), 7.68 (t,  $J = 1.5$  Hz, 1H), 7.87 (dt,  $J = 7.6, 1.5$  Hz, 1H), 10.05 (s, 1H). MS  $m/z$  255 ( $\text{M} + \text{H}$ ) $^+$ .

**4'-Hydroxy-2',3',5',6'-tetramethylbiphenyl-3-carbaldehyde (42b).**

79% yield as colorless crystals. mp 136–137 °C.  $^1\text{H}$  NMR ( $\text{CDCl}_3$ )  $\delta$  1.90 (s, 6H), 2.22 (s, 6H), 4.73 (s, 1H), 7.39 (dt,  $J = 7.6, 1.5$  Hz, 1H), 7.58 (t,  $J = 7.6$  Hz, 1H), 7.63 (t,  $J = 1.5$  Hz, 1H), 7.86 (dt,  $J = 7.6, 1.5$  Hz, 1H), 10.05 (s, 1H). MS  $m/z$  255 ( $\text{M} + \text{H}$ ) $^+$ . Anal. Calcd for  $\text{C}_{17}\text{H}_{18}\text{O}_2$ : C, 80.28; H, 7.13. Found: C, 80.36; H, 7.20.

**3'-Fluoro-4'-hydroxy-2',6'-dimethylbiphenyl-3-carbaldehyde (42c).**

49% yield as colorless crystals (heptane–AcOEt). mp 116–117 °C.  $^1\text{H}$  NMR ( $\text{CDCl}_3$ )  $\delta$  1.91–1.97 (m, 6H), 5.10 (d,  $J = 4.7$  Hz, 1H), 6.78 (d,  $J = 8.9$  Hz, 1H), 7.40 (dt,  $J = 7.6, 1.5$  Hz, 1H), 7.61 (t,  $J = 7.6$  Hz, 1H), 7.65 (t,  $J = 1.5$  Hz, 1H), 7.88 (dt,  $J = 7.6, 1.5$  Hz, 1H), 10.06 (s, 1H). MS  $m/z$  245 ( $\text{M} + \text{H}$ ) $^+$ . Anal. Calcd for  $\text{C}_{15}\text{H}_{13}\text{FO}_2$ : C, 73.76; H, 5.36. Found: C, 73.64; H, 5.29.

Compounds **43b–c** were prepared from **42b–c** by a method similar to that described for **32**.

**3'-(Hydroxymethyl)-2,3,5,6-tetramethylbiphenyl-4-ol (43b).**

93% yield as colorless crystals (heptane–AcOEt). mp 152–153 °C.  $^1\text{H}$  NMR ( $\text{CDCl}_3$ )  $\delta$  1.65 (t,  $J = 5.9$  Hz, 1H), 1.91 (s, 6H), 2.21 (s, 6H), 4.68 (s, 1H), 4.73 (d,  $J = 5.9$  Hz, 2H), 7.01–7.06 (m, 1H), 7.08–7.10 (m, 1H), 7.31–7.36 (m, 1H), 7.40 (t,  $J = 7.4$  Hz, 1H). MS  $m/z$  239 ( $\text{M} - 18 + \text{H}$ ) $^+$ . Anal. Calcd for  $\text{C}_{17}\text{H}_{20}\text{O}_2$ : C, 79.65; H, 7.86. Found: C, 79.32; H, 7.97.

**3-Fluoro-3'-(hydroxymethyl)-2,6-dimethylbiphenyl-4-ol (43c).**

65% yield as colorless crystals. mp 123–124 °C.  $^1\text{H}$  NMR ( $\text{CDCl}_3$ )  $\delta$  1.68 (t,  $J = 6.0$  Hz, 1H), 1.90–1.97 (m, 6H), 4.74 (d,  $J = 6.0$  Hz, 2H), 5.04 (d,  $J = 4.7$  Hz, 1H), 6.75 (d,  $J = 8.9$  Hz, 1H), 7.00–7.07 (m, 1H), 7.11 (s, 1H), 7.32–7.46 (m, 2H). MS  $m/z$  229 ( $\text{M} - 18 + \text{H}$ ) $^+$ .

Compounds **5j–l** were prepared from **43b–c** and appropriate tosylates (1,1-dioxidotetrahydro-2*H*-thiopyran-4-yl 4-methylbenzenesulfonate or **30b**) by a method similar to that described for **5a**.

**{4'-[(1,1-Dioxidotetrahydro-2*H*-thiopyran-4-yl)oxy]-2',3',5',6'-tetramethylbiphenyl-3-yl}methanol (**5j**).**

88% yield as colorless crystals (heptane–AcOEt). mp 203–205 °C.  $^1\text{H}$  NMR ( $\text{CDCl}_3$ )  $\delta$  1.67 (t,  $J = 5.9$  Hz, 1H), 1.88 (s, 6H), 2.21 (s, 6H), 2.29–2.55 (m, 4H), 2.96–3.08 (m, 2H), 3.31–3.44 (m,

2H), 3.95–4.04 (m, 1H), 4.74 (d,  $J = 5.9$  Hz, 2H), 7.02 (d,  $J = 7.4$  Hz, 1H), 7.08 (s, 1H), 7.32–7.37 (m, 1H), 7.41 (t,  $J = 7.4$  Hz, 1H). MS  $m/z$  371 ( $M - 18 + H$ )<sup>+</sup>. Anal. Calcd for C<sub>22</sub>H<sub>28</sub>O<sub>4</sub>S: C, 68.01; H, 7.26. Found: C, 67.93; H, 7.32.

**{2',3',5',6'-Tetramethyl-4'-[3-(methylsulfonyl)propoxy]biphenyl-3-yl}methanol (5k).**

85% yield as colorless crystals (heptane–AcOEt). mp 132–134 °C. <sup>1</sup>H NMR (CDCl<sub>3</sub>) δ 1.66 (t,  $J = 5.9$  Hz, 1H), 1.88 (s, 6H), 2.20 (s, 6H), 2.32–2.43 (m, 2H), 3.00 (s, 3H), 3.35–3.43 (m, 2H), 3.86 (t,  $J = 5.8$  Hz, 2H), 4.73 (d,  $J = 5.9$  Hz, 2H), 7.03 (dt,  $J = 7.3, 1.3$  Hz, 1H), 7.09 (s, 1H), 7.31–7.36 (m, 1H), 7.41 (t,  $J = 7.3$  Hz, 1H). MS  $m/z$  359 ( $M - 18 + H$ )<sup>+</sup>. Anal. Calcd for C<sub>21</sub>H<sub>28</sub>O<sub>4</sub>S: C, 66.99; H, 7.50. Found: C, 66.67; H, 7.32.

**{4'-[(1,1-Dioxidotetrahydro-2H-thiopyran-4-yl)oxy]-3'-fluoro-2',6'-dimethylbiphenyl-3-yl}methanol (5l).**

A crude product (quantitative) as a colorless oil. MS  $m/z$  361 ( $M - 18 + H$ )<sup>+</sup>.

**4'-{[*tert*-Butyl(dimethyl)silyl]oxy}-3'-chloro-2',6'-dimethylbiphenyl-3-carbaldehyde (44a).**

The title compound was prepared from **42d** by a method similar to that described for **31d** in 88% yield as a colorless oil. <sup>1</sup>H NMR (CDCl<sub>3</sub>) δ 0.27 (s, 6H), 1.06 (s, 9H), 1.92 (s, 3H), 2.04 (s, 3H), 6.68 (s, 1H), 7.37–7.42 (m, 1H), 7.56–7.66 (m, 2H), 7.85–7.90 (m, 1H), 10.05 (s, 1H). MS  $m/z$  375 ( $M + H$ )<sup>+</sup>.

Compounds **44b–d** were prepared from tosylate **30b** and phenols **42a**, **42c**, or **42e** by a method similar to that described for **5a**.

**2',6'-Diethyl-4'-[3-(methylsulfonyl)propoxy]biphenyl-3-carbaldehyde (44b).**

80% yield as a pale yellow oil. <sup>1</sup>H NMR (CDCl<sub>3</sub>) δ 1.00 (t,  $J = 7.5$  Hz, 6H), 2.27 (q,  $J = 7.5$  Hz, 4H), 2.32–2.43 (m, 2H), 2.98 (s, 3H), 3.24–3.33 (m, 2H), 4.17 (t,  $J = 5.9$  Hz, 2H), 6.69 (s, 2H), 7.40–7.46 (m, 1H), 7.58 (t,  $J = 7.6$  Hz, 1H), 7.65–7.70 (m, 1H), 7.84–7.90 (m, 1H), 10.05 (s, 1H). MS  $m/z$  375 ( $M + H$ )<sup>+</sup>.

**3'-Fluoro-2',6'-dimethyl-4'-[3-(methylsulfonyl)propoxy]biphenyl-3-carbaldehyde (44c).**

95% yield as colorless crystals (heptane–AcOEt). mp 117–118 °C. <sup>1</sup>H NMR (CDCl<sub>3</sub>) δ 1.93 (d,  $J = 2.8$  Hz, 3H), 1.97 (s, 3H), 2.34–2.45 (m, 2H), 2.99 (s, 3H), 3.28–3.36 (m, 2H), 4.22 (t,  $J = 5.7$  Hz, 2H), 6.73 (d,  $J = 8.3$  Hz, 1H), 7.39 (dt,  $J = 7.6, 1.4$  Hz, 1H), 7.58–7.66 (m, 2H), 7.89 (dt,  $J = 7.6, 1.4$  Hz, 1H), 10.06 (s, 1H). MS  $m/z$  365 ( $M + H$ )<sup>+</sup>. Anal. Calcd for C<sub>19</sub>H<sub>21</sub>FO<sub>4</sub>S: C, 62.62; H, 5.81. Found: C, 62.66; H, 5.81.

**3',5'-Dichloro-2',6'-dimethyl-4'-[3-(methylsulfonyl)propoxy]biphenyl-3-carbaldehyde (44d).**

53% yield as colorless crystals (heptane–AcOEt). mp 135–136 °C. <sup>1</sup>H NMR (CDCl<sub>3</sub>) δ 2.03 (s, 6H), 2.37–2.48 (m, 2H), 3.00 (s, 3H), 3.44–3.51 (m, 2H), 4.18 (t, *J* = 5.7 Hz, 2H), 7.34–7.39 (m, 1H), 7.61–7.68 (m, 2H), 7.89–7.94 (m, 1H), 10.06 (s, 1H). MS *m/z* 415 (M + H)<sup>+</sup>. Anal. Calcd for C<sub>19</sub>H<sub>20</sub>Cl<sub>2</sub>O<sub>4</sub>S: C, 54.94; H, 4.85. Found: C, 54.93; H, 4.89.

Compounds **5h**, **i**, **m**, and **n** were prepared from **44a–d** by a method similar to that described for **32**.

**(4'-{*tert*-Butyl(dimethyl)silyl}oxy)-3'-chloro-2',6'-dimethylbiphenyl-3-yl}methanol (5h).**

97% yield as a colorless oil. <sup>1</sup>H NMR (CDCl<sub>3</sub>) δ 0.26 (s, 6H), 1.06 (s, 9H), 1.69 (br s, 1H), 1.93 (s, 3H), 2.05 (s, 3H), 4.74 (s, 2H), 6.66 (s, 1H), 7.01–7.07 (m, 1H), 7.09–7.13 (m, 1H), 7.32–7.45 (m, 2H). MS *m/z* 377 (M + H)<sup>+</sup>.

**{2',6'-Diethyl-4'-[3-(methylsulfonyl)propoxy]biphenyl-3-yl}methanol (5i).**

84% yield as colorless crystals (heptane–AcOEt). mp 115–116 °C. <sup>1</sup>H NMR (CDCl<sub>3</sub>) δ 1.01 (t, *J* = 7.5 Hz, 6H), 1.66 (t, *J* = 5.9 Hz, 1H), 2.24–2.42 (m, 6H), 2.97 (s, 3H), 3.25–3.33 (m, 2H), 4.16 (t, *J* = 5.7 Hz, 2H), 4.73 (d, *J* = 5.9 Hz, 2H), 6.67 (s, 2H), 7.06–7.10 (m, 1H), 7.12–7.16 (m, 1H), 7.32–7.43 (m, 2H). MS *m/z* 359 (M – 18 + H)<sup>+</sup>. Anal. Calcd for C<sub>21</sub>H<sub>28</sub>O<sub>4</sub>S: C, 66.99; H, 7.50. Found: C, 66.92; H, 7.46.

**{3'-Fluoro-2',6'-dimethyl-4'-[3-(methylsulfonyl)propoxy]biphenyl-3-yl}methanol (5m).**

94% yield as colorless crystals (heptane–AcOEt). mp 62–63 °C. <sup>1</sup>H NMR (CDCl<sub>3</sub>) δ 1.70 (t, *J* = 5.9 Hz, 1H), 1.93 (d, *J* = 3.0 Hz, 3H), 1.97 (s, 3H), 2.32–2.45 (m, 2H), 2.98 (s, 3H), 3.27–3.37 (m, 2H), 4.20 (t, *J* = 5.8 Hz, 2H), 4.74 (d, *J* = 5.9 Hz, 2H), 6.70 (d, *J* = 8.3 Hz, 1H), 6.99–7.08 (m, 1H), 7.10 (s, 1H), 7.32–7.47 (m, 2H). MS *m/z* 349 (M – 18 + H)<sup>+</sup>. Anal. Calcd for C<sub>19</sub>H<sub>23</sub>FO<sub>4</sub>S: C, 62.27; H, 6.33. Found: C, 62.63; H, 6.65.

**{3',5'-Dichloro-2',6'-dimethyl-4'-[3-(methylsulfonyl)propoxy]biphenyl-3-yl}methanol (5n).**

98% yield as a colorless oil. <sup>1</sup>H NMR (CDCl<sub>3</sub>) δ 1.76 (t, *J* = 5.7 Hz, 1H), 2.03 (s, 6H), 2.36–2.47 (m, 2H), 3.00 (s, 3H), 3.43–3.51 (m, 2H), 4.16 (t, *J* = 5.7 Hz, 2H), 4.75 (d, *J* = 5.7 Hz, 2H), 6.97–7.03 (m, 1H), 7.07–7.08 (m, 1H), 7.36–7.48 (m, 2H). MS *m/z* 417 (M + H)<sup>+</sup>.

## X-Ray Crystallographic Data for Compound 16

### A. Crystal Data

|                                       |                                                                                                                                                           |
|---------------------------------------|-----------------------------------------------------------------------------------------------------------------------------------------------------------|
| Empirical Formula                     | C <sub>29</sub> H <sub>32</sub> O <sub>7</sub> S·1/2H <sub>2</sub> O                                                                                      |
| Formula Weight                        | 533.64                                                                                                                                                    |
| Crystal Color, Habit                  | colorless, platelet                                                                                                                                       |
| Crystal Dimensions                    | 0.30 x 0.20 x 0.05 mm                                                                                                                                     |
| Crystal System                        | triclinic                                                                                                                                                 |
| Lattice Type                          | Primitive                                                                                                                                                 |
| No. of Reflections Used for Unit      |                                                                                                                                                           |
| Cell Determination (2 $\theta$ range) | 25654 (7.3–136.5°)                                                                                                                                        |
| Indexing Images                       | 3 oscillations at 3.0 minutes                                                                                                                             |
| Camera Radius                         | 127.40 mm                                                                                                                                                 |
| Lattice Parameters                    | a = 7.912(2) Å<br>b = 9.698(3) Å<br>c = 36.602(9) Å<br>$\alpha$ = 91.59(2)°<br>$\beta$ = 92.35(2)°<br>$\gamma$ = 107.59(2)°<br>V = 2672(4) Å <sup>3</sup> |
| Space Group                           | P1(#1)                                                                                                                                                    |
| Z value                               | 4                                                                                                                                                         |
| D <sub>calc</sub>                     | 1.326 g/cm <sup>3</sup>                                                                                                                                   |
| F <sub>000</sub>                      | 1132.00                                                                                                                                                   |
| $\mu$ (CuK $\alpha$ )                 | 14.80 cm <sup>-1</sup>                                                                                                                                    |

### B. Intensity Measurements

|                                                    |                                                                 |
|----------------------------------------------------|-----------------------------------------------------------------|
| Diffractometer                                     | Rigaku RAXIS-RAPID Imaging Plate                                |
| Radiation                                          | CuK $\alpha$ ( $\lambda$ = 1.54186 Å)<br>graphite monochromated |
| Temperature                                        | −173.0 °C                                                       |
| Voltage, Current                                   | 50 kV, 100 mA                                                   |
| Collimator Size                                    | 0.5 mm                                                          |
| Detector Aperture                                  | 460.0 mm x 256.0 mm                                             |
| Data Images                                        | 45 exposures at 1.5 minutes per degree                          |
| Oscillation Range ( $\phi$ = 0.0°, $\chi$ = 50.0°) | $\omega$ 50.0–230.0° with 20.0° step                            |

|                                                               |                                                                       |
|---------------------------------------------------------------|-----------------------------------------------------------------------|
| Oscillation Range ( $\phi = 90.0^\circ, \chi = 50.0^\circ$ )  | $\omega 50.0\text{--}230.0^\circ$ with $20.0^\circ$ step              |
| Oscillation Range ( $\phi = 195.0^\circ, \chi = 50.0^\circ$ ) | $\omega 50.0\text{--}230.0^\circ$ with $20.0^\circ$ step              |
| Oscillation Range ( $\phi = 270.0^\circ, \chi = 50.0^\circ$ ) | $\omega 50.0\text{--}230.0^\circ$ with $20.0^\circ$ step              |
| Oscillation Range ( $\phi = 60.0^\circ, \chi = 10.0^\circ$ )  | $\omega 50.0\text{--}230.0^\circ$ with $20.0^\circ$ step              |
| Camera Radius                                                 | 127.40 mm                                                             |
| Pixel Size                                                    | 0.100 mm                                                              |
| $2\theta_{\max}$                                              | $136.5^\circ$                                                         |
| No. of Reflections Measured                                   | Total: 27623<br>Unique: 8873 ( $R_{\text{int}} = 0.040$ )             |
| Corrections                                                   | Lorentz-polarization<br>Absorption<br>(trans. factors: 0.6381–0.9287) |

### C. Structure Solution and Refinement

|                                 |                                                                                             |
|---------------------------------|---------------------------------------------------------------------------------------------|
| Structure Solution              | Direct Methods (SIR92)                                                                      |
| Refinement                      | Full-matrix least-squares (SHELXL-97)                                                       |
| Function Minimized              | $\Sigma \omega(F_o^2 - F_c^2)^2$                                                            |
| Least Squares Weights           | $\omega = [\sigma^2(F_o^2) + (0.0587P)^2 + 0.0000P]^{-1}$<br>where $P = (F_o^2 + 2F_c^2)/3$ |
| No. of Reflections              | 12146                                                                                       |
| No. Variables                   | 1348                                                                                        |
| Reflection/Parameter Ratio      | 9.01                                                                                        |
| Residuals: R; Rw                | 0.063 ; 0.166                                                                               |
| Goodness of Fit Indicator       | 1.01                                                                                        |
| Max Shift/Error in Final Cycle  | 0.00                                                                                        |
| Maximum peak in Final Diff. Map | $0.70 \text{ e}^-/\text{\AA}^3$                                                             |
| Minimum peak in Final Diff. Map | $-0.55 \text{ e}^-/\text{\AA}^3$                                                            |
| Flack Parameter                 | -0.05(2)                                                                                    |
